# Supplementary material for: The nature of the styrylindolium dye: transformations among its monomer, aggregates and water adducts
Source: Royal Society of Chemistry journal article supplement (doi:10.1039/c3tc30768a), 2013-01-01
Supplement: c3tc30768a.pdf [file c3tc30768a.pdf]

## Supporting Information

### The nature of the styrylindolium dye: transformations among monomer, aggregates and water adducts

Chang Liu,<sup>[a]</sup> Yan Lu,<sup>[a]</sup> Song He,<sup>[a]</sup> Qing Wang,<sup>[a]</sup> Liancheng Zhao,<sup>[a,b]</sup> and Xianshun Zeng\*<sup>[a]</sup>

<sup>†</sup> Key Laboratory of Display Materials & Photoelectric Devices, Ministry of Education, School of Materials Science & Engineering, Tianjin University of Technology, Tianjin 300384, China. Fax: +86-22-60215226; Tel: +86-22-60216748; E-mail: [xshzeng@tjut.edu.cn](mailto:xshzeng@tjut.edu.cn)

<sup>‡</sup> School of Materials Science and Engineering, Harbin Institute of Technology, Harbin 150001, China.

**Materials and methods:** All solvents and reagents (analytical grade) were obtained commercially and used as received unless otherwise mentioned. NMR spectra were recorded on a Bruker spectrometer at 400 (<sup>1</sup>H NMR) MHz, 100 (<sup>13</sup>C NMR) MHz. Chemical shifts ( $\delta$  values) were reported in ppm down field from internal Me<sub>4</sub>Si (<sup>1</sup>H and <sup>13</sup>C NMR). High resolute ESI mass spectra were recorded on a Xevo QToF mass spectrometer (Waters, USA). Elemental analyses were performed on a Vanio-EL elemental analyzer (Analysensysteme GmbH, Germany). UV absorption spectra were recorded on a UV-3600 UV-VIS spectrophotometer (Shimadzu, Japan). Fluorescence measurements were performed using an F-4600 fluorescence spectrophotometer (Hitachi, Japan) equipped with a quartz cell (1 cm × 1 cm). Melting points were recorded on a Boetius Block apparatus and are uncorrected.

#### Synthesis of tetrafluoroborate of 2-{2-[2-methoxyphenyl]ethenyl}-1,3,3'-trimethylindoline

**4.** To a 50 ml flask, was charged N-methyl-2,3,3'-trimethylindolium iodide **1** (650 mg, 2.0 mmol), 2-methoxybenzaldehyde **2** (360 mg, 2.6 mmol) and anhydrous ethanol (25 mL). The reaction mixture was washed with nitrogen flow for 30 min to remove oxygen, and then stirred at 90 °C for 24 h in dark to afforded compound **3**. After cooling to room temperature, KBF<sub>4</sub> (410 mg, 3.3 mmol) was added in one portion to the reaction mixture. The suspension was refluxed for another 2 h in dark. The solvent was removed under reduced pressure. The residue was dissolved in DMF (5 mL) and filtered; the solid salt was washed with DMF (2 × 1 mL). The filtrate was condensed to dryness under reduced pressure. The residue was dissolved with

hot ethanol (10 mL). After cooling to room temperature, **4** was crystallized from the solvent to get pure product (570 mg) in 72% yield; mp 212-214 °C; HRMS:  $m/z$   $[M-BF_4]^{+} = 292.1696$ ;  $^1H$  NMR ( $CDCl_3$ , 400 MHz, ppm): 1.87 (s, 6H), 4.03 (s, 3H), 4.47 (s, 3H), 7.00 (d,  $J = 8.4$  Hz, 7.19 (t,  $J = 7.6$  Hz, 1H), 7.60-7.58 (t,  $J = 5$  Hz, 4H), 7.70 (d,  $J = 7.2$  Hz, 1H), 7.85 (d,  $J = 16.4$  Hz, 1H), 8.38 (d,  $J = 8$  Hz, 1H), 8.62 (d,  $J = 16.4$  Hz, 1H) (Figure S23);  $^{13}C$  NMR ( $DMSO-d_6$ , 100 MHz, ppm): 182.7, 160.32, 148.16, 144.15, 142.71, 136.35, 131.13, 130.22, 129.89, 123.74, 123.45, 122.03, 116.12, 114.13, 113.27, 57.32, 52.90, 35.54, 26.75 (Figure S9). Elemental analysis calcd (%) for  $C_{20}H_{22}B_2F_4NO \cdot 0.5CH_2Cl_2$ : C, 58.39; H, 5.50, N, 3.32; Found: C, 58.71; H, 5.66; N, 3.32.

**Table S1.** Temperature Dependence of the Equilibrium Constant (*K*) for the Thermal Interconversion of **4** to **4-OH**.

|          |        |        |        |        |        |        |        |        |
|----------|--------|--------|--------|--------|--------|--------|--------|--------|
| T (K)    | 288    | 293    | 298    | 303    | 308    | 313    | 318    | 323    |
| <i>K</i> | 1.0038 | 1.0046 | 1.0054 | 1.0068 | 1.0082 | 1.0097 | 1.0117 | 1.0137 |

**Table S2.** Temperature Dependence of the Equilibrium Constant (*K*) for the Thermal Interconversion of the D-Aggregate of **4** to its Monomer.

|          |        |        |        |         |         |        |        |        |
|----------|--------|--------|--------|---------|---------|--------|--------|--------|
| T (K)    | 288    | 293    | 298    | 303     | 308     | 313    | 318    | 323    |
| <i>K</i> | 1.0142 | 1.0175 | 1.0222 | 1.02734 | 1.03312 | 1.0398 | 1.0478 | 1.0557 |

The temperature-dependent fluorescence change could be expressed thermodynamically by a D-aggregate-monomer equilibrium model. The equilibrium constant *K* for the equilibrium between D-aggregate and **4** in eqn. (S1) can be analysed by eqn. (S2), where *I*<sub>lower temp.</sub>, *I*<sub>higher temp.</sub> and *I*<sub>obs</sub> denote the fluorescence intensity at λ<sub>em</sub> for the lower-temperature and higher-temperature species and the experimental fluorescence intensity, respectively. The temperature dependence of the equilibrium constant *K* is given by eqn. (S3), where *R* and *T* are the gas constant and absolute temperature, respectively. The temperature dependence of *K* is summarized in Table S2. The least squares fit for eqn. (S3) has been carried out using the postulated values of *I*<sub>lower temp.</sub> and *I*<sub>higher temp.</sub> until a good linear relationship in the ln *K* vs. *T*<sup>-1</sup> plot could be obtained. An optimized linear plot of ln *K* for **4** against *T*<sup>-1</sup> could be obtained as shown in Inset of Fig. 7b on the assumption that *I*<sub>lower temp.</sub> and *I*<sub>higher temp.</sub> are equal to 667 at 273 K and 281 at 338 K, respectively.

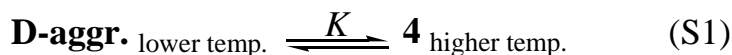

$$K = \frac{[\text{4}_{\text{higher temp.}}]}{[\text{D-aggr.}_{\text{lower temp.}}]} = \frac{(I_{\text{lower temp.}} - I_{\text{obs}})}{(I_{\text{obs}} - I_{\text{higher temp.}})} \quad (\text{S2})$$

$$\ln K = \ln \frac{(I_{\text{lower temp.}} - I_{\text{obs}})}{(I_{\text{obs}} - I_{\text{higher temp.}})} = \frac{\Delta S^{\circ}}{R} - \frac{\Delta H^{\circ}}{RT} \quad (\text{S3})$$

From the slope ( $-\Delta H^{\circ}/R$ ) of the van't Hoff plot a standard enthalpy  $\Delta H^{\circ}$  value of +887.82 J/mol was calculated. From this value and the *K* value of 1.0222 at 25 °C, a standard entropy  $\Delta S^{\circ}$  value of +3.16 J·mol<sup>-1</sup>·K<sup>-1</sup> was determined.

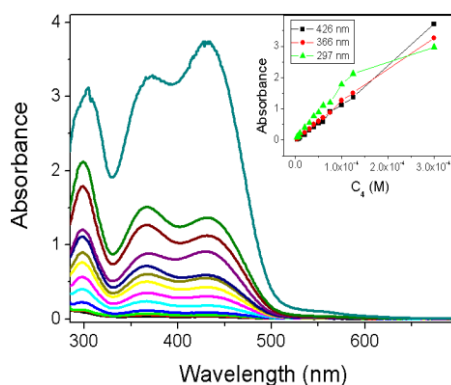

**Figure S1.** Concentration-dependent UV/Vis absorption spectra of **4** in toluene from  $3.5 \times 10^{-6}$  M to  $3 \times 10^{-4}$  M. Inset: Plot of the absorptions of H-aggregate at 297 nm, D-aggregate at 366 nm and monomer at 426 nm against concentration.

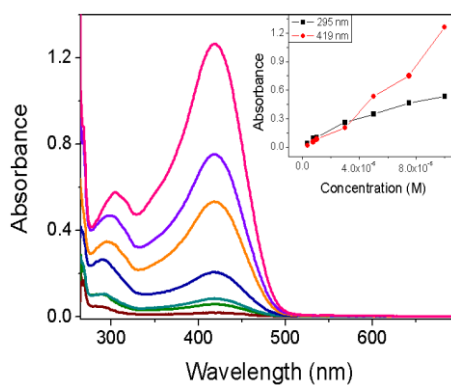

**Figure S2.** Concentration-dependent UV/Vis absorption spectra of **4** in DMF from  $3.5 \times 10^{-6}$  M to  $1 \times 10^{-4}$  M. Inset: Plot of the absorptions of H-aggregate at 295 nm and monomer at 419 nm against concentration.

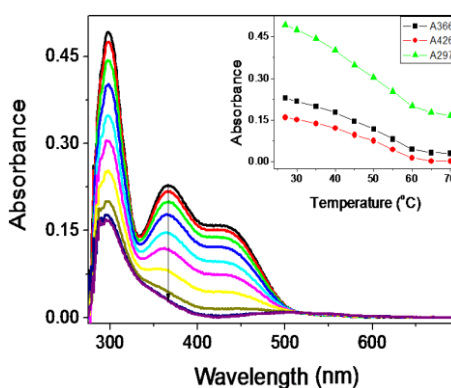

**Figure S3.** Temperature-dependent transformation from the monomer, D-aggregate and H-aggregate to water adducts for dye **4** ( $3 \times 10^{-5}$  M) in equilibrated toluene (the solution of **4** was stocked for 3.5 h before the experiments). Inset: plot of the absorption intensity changes at 426 nm, 366 nm and 297 nm against temperature.

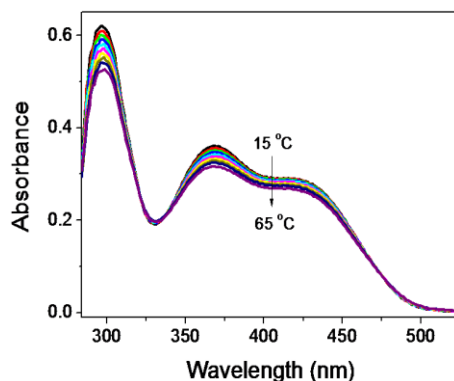

**Figure S4.** Temperature-dependent transformation from monomer, D-aggregate and H-aggregate to water adducts for dye **4** ( $3 \times 10^{-5}$  M) in THF equilibrated for 3.5 h before the experiments.

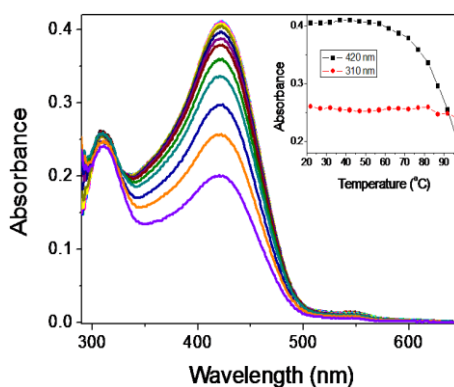

**Figure S5.** Temperature-dependent transformation from monomer, D-aggregate and H-aggregate to water adducts for dye **4** ( $3 \times 10^{-5}$  M) in equilibrated THF/H<sub>2</sub>O (v/v, 3:1) solution. Inset: Plot of the absorption of H-aggregate at 310 nm and monomer at 420 nm against temperature. Note: the solution of **4** was equilibrated for 17 h before the experiments.

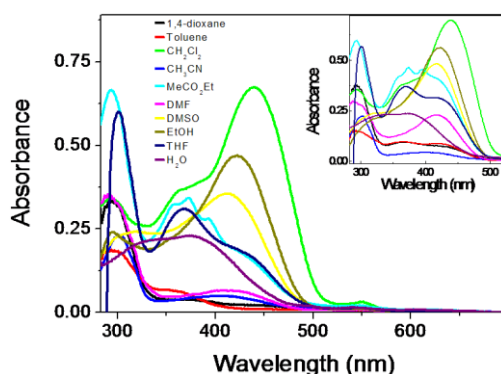

**Figure S6.** The absorption spectra of **4** ( $3 \times 10^{-5}$  M) equilibrated for 60 h in various solvents before experiments. Inset: The absorption spectra of **4** upon the addition of acetic acid in various solvents. Note: The spectra were recorded immediately upon the addition of acetic acid. The line was presented in the same colour for the equilibrated solutions and the addition of acetic acid.

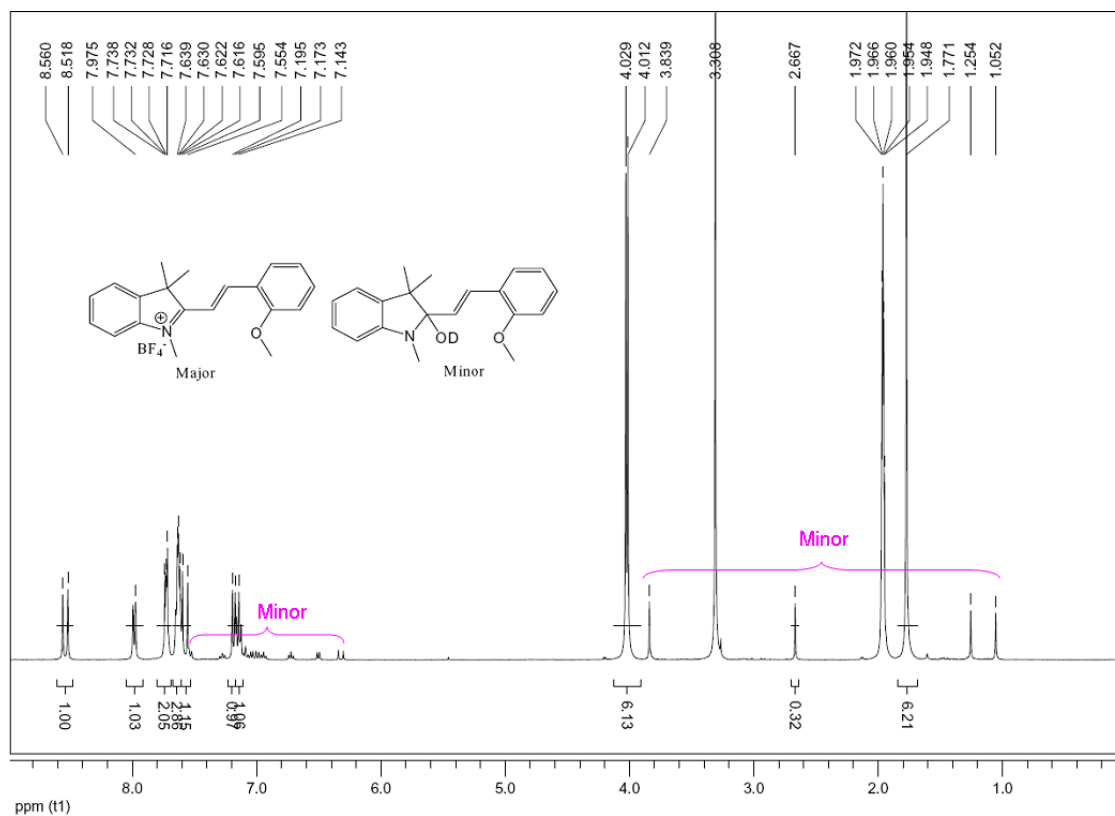

**Figure S7.** <sup>1</sup>H NMR of **4** (400 MHz) in CD<sub>3</sub>CN. The spectra of the freshly prepared solution of **4** were taken within 10 min. Two species can be observed in the spectra (about 10% of water adduct can be observed as marked 'Minor' in the spectra), indicated the formation of water adducts by the reaction of **4** with the water residue in the solvent carried out quickly.

<sup>1</sup>H NMR (CD<sub>3</sub>CN, 400 MHz, ppm): 8.54 (d, 1H, *J* = 16.4 Hz), 7.98 (d, 1H, *J* = 7.6 Hz), 7.74-7.71 (m, 2H), 7.65-7.61 (m, 3H), 7.57 (d, 1H, *J* = 16.4 Hz), 7.18 (d, 1H, *J* = 8.4 Hz), 7.14 (t, 1H, *J* = 7.6 Hz), 4.03 (s, 3H), 4.01 (s, 3H), 1.77 (s, 6H). At the same time, about 10% of water adduct can be observed at 7.53 (d, 1H, *J* = 7.6 Hz), 7.28 (d, 1H, *J* = 7.2 Hz), 7.12 (1H, overlapped), 7.09 (t, 1H, *J* = 8.0 Hz), 7.04 (d, 1H, *J* = 7.2 Hz), 6.99 (d, 1H, *J* = 8.0 Hz), 6.94 (t, 1H, *J* = 7.6 Hz), 6.72 (t, 1H, *J* = 7.6 Hz), 6.50 (d, 1H, *J* = 7.6 Hz), 6.32 (d, 1H, *J* = 16.4 Hz), 3.84 (s, 3H), 2.67 (s, 3H), 1.25 (s, 3H), 1.05 (s, 3H), respectively.

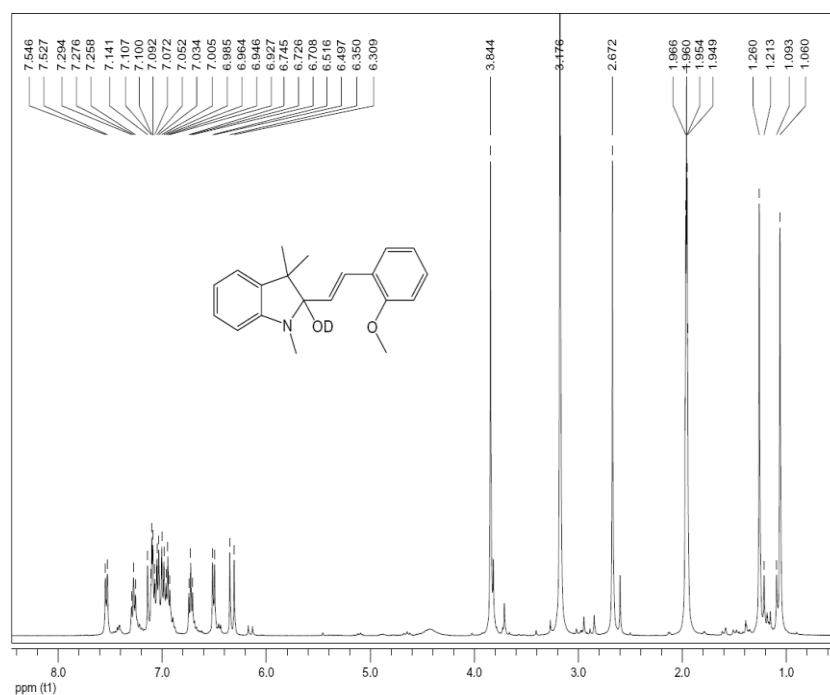

**Figure S8.**  $^1\text{H}$  NMR of **4** (400 MHz,  $\text{CD}_3\text{CN}$ ) upon the addition of NaOD (2 equivalents). The spectra were recorded immediately after the addition of NaOD.

$^1\text{H}$  NMR ( $\text{CD}_3\text{CN}$ , 400 MHz, ppm): 7.53 (d, 1H,  $J = 7.6$  Hz), 7.28 (d, 1H,  $J = 7.2$  Hz), 7.12 (d, 1H,  $J = 16.4$  Hz), 7.09 (t, 1H,  $J = 8.0$  Hz), 7.04 (d, 1H,  $J = 7.2$  Hz), 6.99 (d, 1H,  $J = 8.0$  Hz), 6.95 (t, 1H,  $J = 7.6$  Hz), 6.73 (t, 1H,  $J = 7.6$  Hz), 6.50 (d, 1H,  $J = 7.6$  Hz), 6.33 (d, 1H,  $J = 16.4$  Hz), 3.84 (s, 3H), 2.67 (s, 3H), 1.26 (s, 3H), 1.06 (s, 3H).

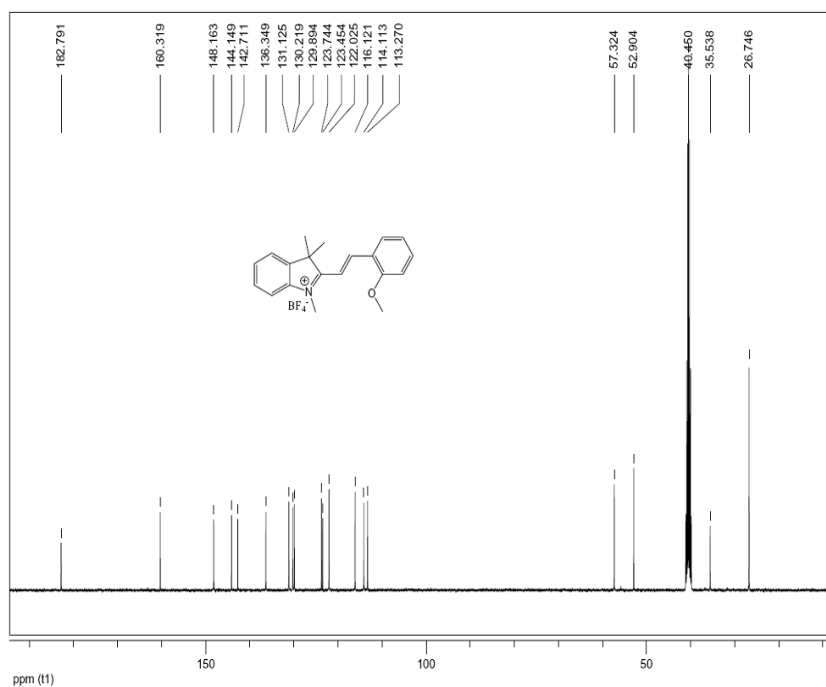

**Figure S9.**  $^{13}\text{C}$  NMR of **4** (100 MHz) in  $\text{DMSO-d}_6$ .

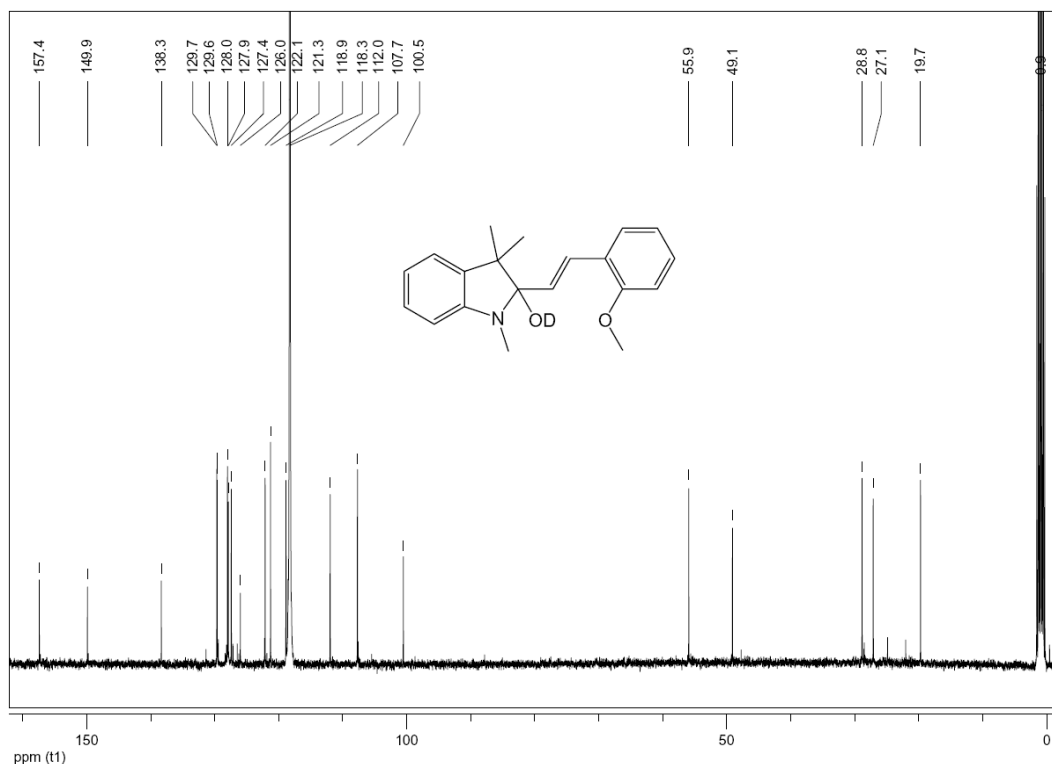

**Figure S10.**  $^{13}\text{C}$  NMR of **4** (100 MHz) in  $\text{CD}_3\text{CN}$

$^{13}\text{C}$  NMR ( $\text{CD}_3\text{CN}$ , 100 MHz, ppm): 157.4, 149.9, 138.3, 129.7, 129.6, 128.0, 127.9, 127.4, 126.0, 122.1, 121.3, 118.9, 112.0, 107.7, 100.5, 55.9, 49.1, 28.8, 27.1, 19.7.

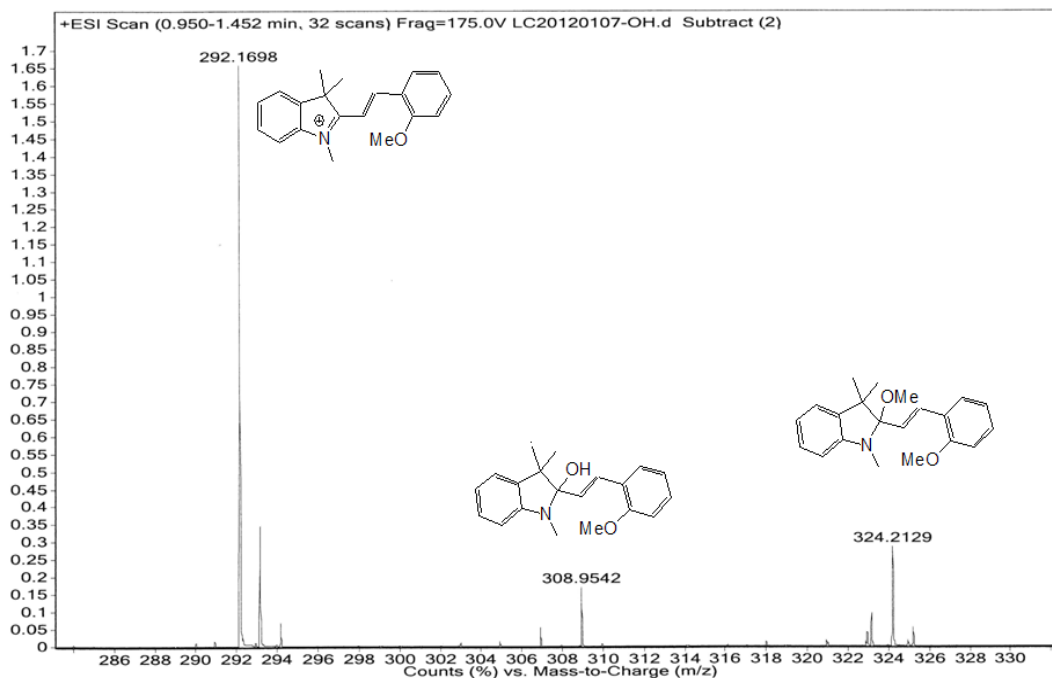

**Figure S11.** High-resolution mass spectra (HRMS) of **4** in an equilibrated methanol/ $\text{H}_2\text{O}$  (99:1, v/v) solution. The peak ( $m/z$ ) at 308.9542 and the peak ( $m/z$ ) at 324.2129 corresponded the water adducts and the methanol adducts, respectively.



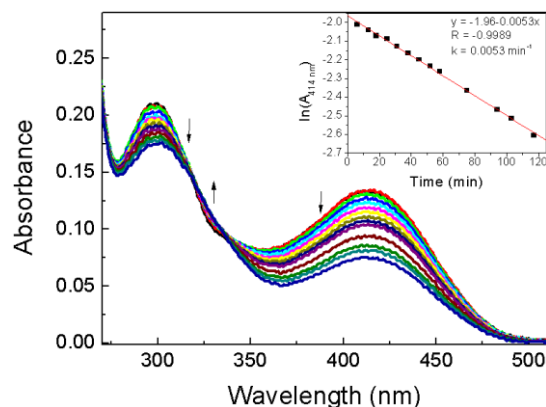

**Figure S12.** The kinetic measurements of the reaction of **4** (30  $\mu$ M) with water in NaOH (0.01 M) under pseudo-first-order conditions by UV/Vis absorption spectra. Inset: plot of  $\ln(A_{414 \text{ nm}})$  at 414 nm observed against time (min) from the reaction between **4** (30  $\mu$ M) and H<sub>2</sub>O in NaOH (0.01 M) at T = 298 K. The red line overlaid on the experimental data points is theoretical fit generated using  $k_{obs} = 5.3 \times 10^{-3} \text{ min}^{-1}$ .

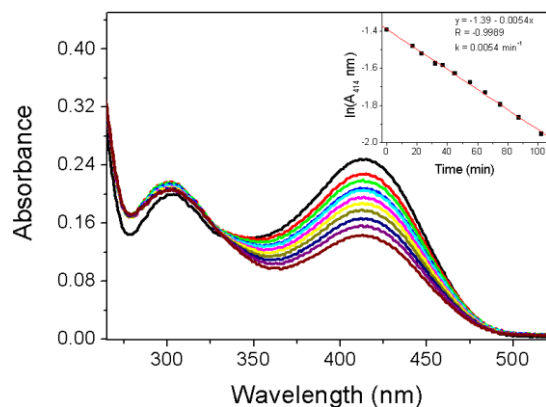

**Figure S13.** The kinetic measurements of the reaction of **4** (30  $\mu$ M) with water in NaOH (0.005 M) under pseudo-first-order conditions by UV/Vis absorption spectra. Inset: plot of  $\ln(A_{414 \text{ nm}})$  at 414 nm observed against time (min) from the reaction between **4** (30  $\mu$ M) and H<sub>2</sub>O in NaOH (0.005 M) at T = 298 K. The red line overlaid on the experimental data points is theoretical fit generated using  $k_{obs} = 5.4 \times 10^{-3} \text{ min}^{-1}$ .

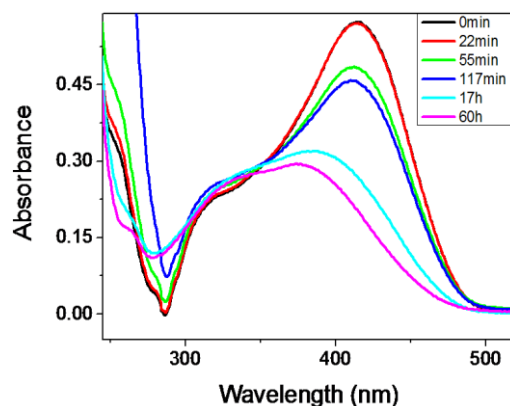

**Figure S14.** Time-dependent transition from monomer into the D-aggregate for dye **4** ( $3 \times 10^{-5} \text{ M}$ ) in 1.5 M HCl at 25 °C.

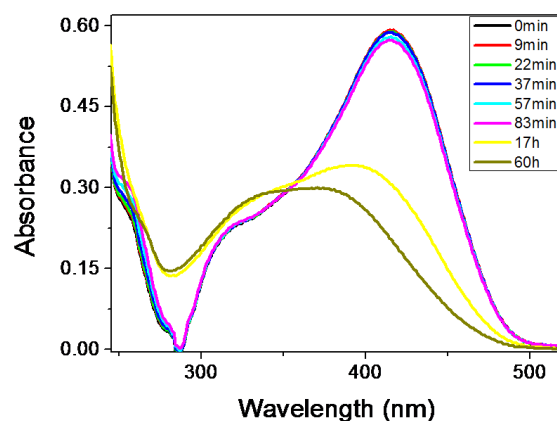

**Figure S15.** Time-dependent transition from monomer into D-aggregate for dye **4** ( $3 \times 10^{-5}$  M) in 2.1 M HCl at 25 °C.

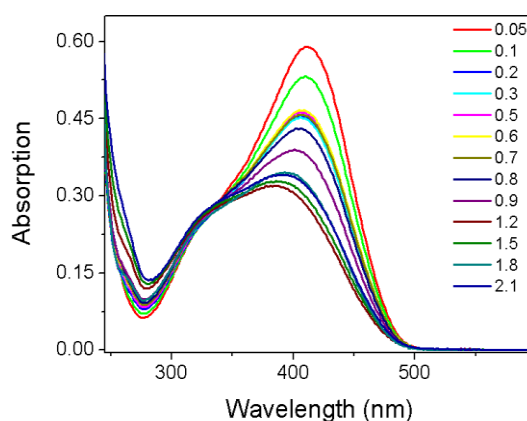

**Figure S16.** UV/Vis spectra of **4** ( $3 \times 10^{-5}$  M) equilibrated for 17 h in different concentrations of HCl (from 0.05 M to 2.1 M) at 25 °C. The monomeric absorptions at ca. 410 nm of all the equilibrated solutions decreased with the increased HCl concentrations from 0.05 M to 1.2 M. At the same time, the D-aggregate absorptions at ca. 330 nm increased slightly with the increased HCl concentrations from 0.05 M to 1.2 M. However, the absorptions at 410 nm slightly increased with higher HCl concentrations than 1.2 M.

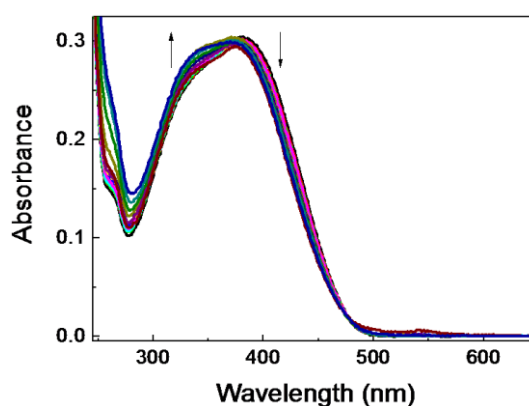

**Figure S17.** UV/vis spectra of **4** ( $3 \times 10^{-5}$  M) in different of HCl concentrations (from 0.05 M to 2.1 M) equilibrated for 60 h at 25 °C. The monomeric absorptions at ca. 410 nm slightly decreased with the increased HCl concentrations from 0.05 M to 1.2 M. At the same time, the D-aggregate absorptions at ca. 330 nm increased slightly with the increased HCl concentrations from 0.05 M to 1.2 M. The absorptions at 330 nm and the absorptions at 410 nm kept constant while the HCl concentrations higher than 1.2 M.

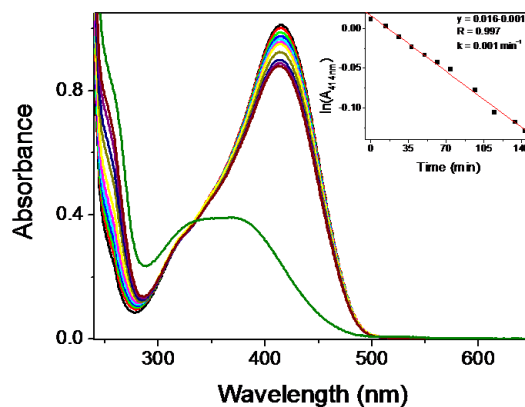

**Figure S18.** The kinetic measurements of the formation of D-aggregate in HCl (1.2 M) under pseudo-first-order conditions by UV/Vis absorption spectra. Inset: plot of  $\ln(A_{414 \text{ nm}})$  at 414 nm observed against time (min) from the reaction between **4** (30  $\mu\text{M}$ ) and  $\text{H}_2\text{O}$  in NaOH (0.005 M) at  $T = 298 \text{ K}$ . The red line overlaid on the experimental data points is theoretical fit generated using  $k_{obs} = 1.0 \times 10^{-3} \text{ min}^{-1}$ .

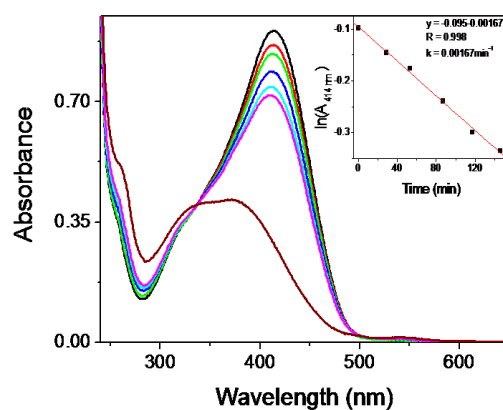

**Figure S19.** The kinetic measurements of the formation of D-aggregate in HCl (1.5 M) under pseudo-first-order conditions by UV/Vis absorption spectra. Inset: plot of  $\ln(A_{414 \text{ nm}})$  at 414 nm observed against time (min) from the reaction between **4** (30  $\mu\text{M}$ ) and  $\text{H}_2\text{O}$  in NaOH (0.005 M) at  $T = 298 \text{ K}$ . The red line overlaid on the experimental data points is theoretical fit generated using  $k_{obs} = 1.67 \times 10^{-3} \text{ min}^{-1}$ .

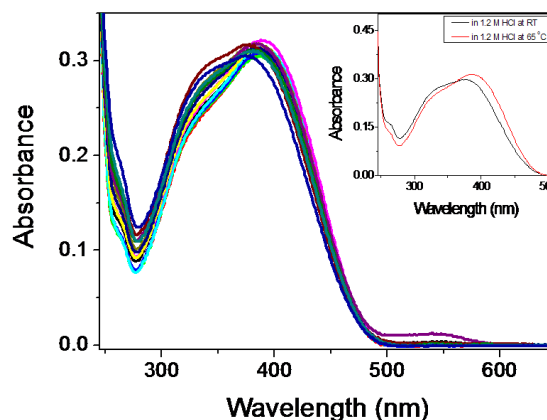

**Figure S20.** UV/vis spectra of **4** ( $3 \times 10^{-5} \text{ M}$ ) equilibrated for 60 h before the experiments in different of HCl concentrations (from 0.05 M to 2.1 M) upon increasing the temperature to 65 °C.

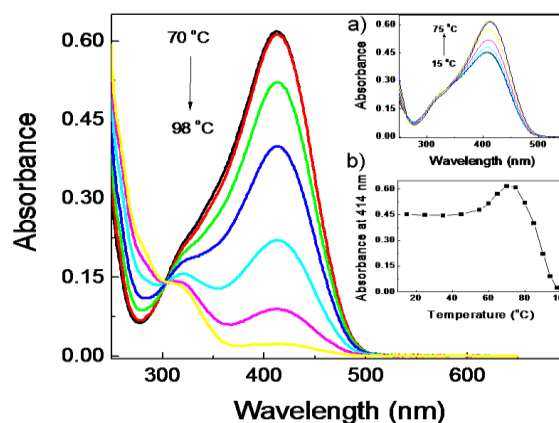

**Figure S21.** UV-Vis spectra of **4** ( $3 \times 10^{-5}$  M) in water at pH 4.4 with increasing temperature from 70 °C to 98 °C. Inset a): UV-Vis spectra of **4** ( $3 \times 10^{-5}$  M) in water at pH 4.4 with increasing temperature from 15 °C to 70 °C. Inset b): Plot of absorbance at 414 nm against temperature.

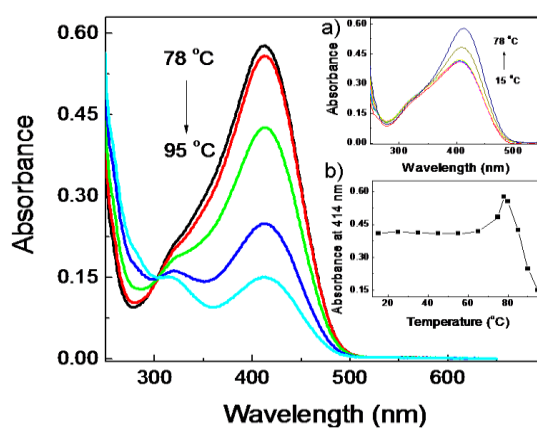

**Figure S22.** UV-Vis spectra of **4** ( $3 \times 10^{-5}$  M) in water at pH 5.5 with increasing temperature from 78 °C to 95 °C. Inset a): UV-Vis spectra of **4** ( $3 \times 10^{-5}$  M) in water at pH 5.5 with increasing temperature from 15 °C to 78 °C. Inset b): Plot of absorbance at 414 nm against temperature.

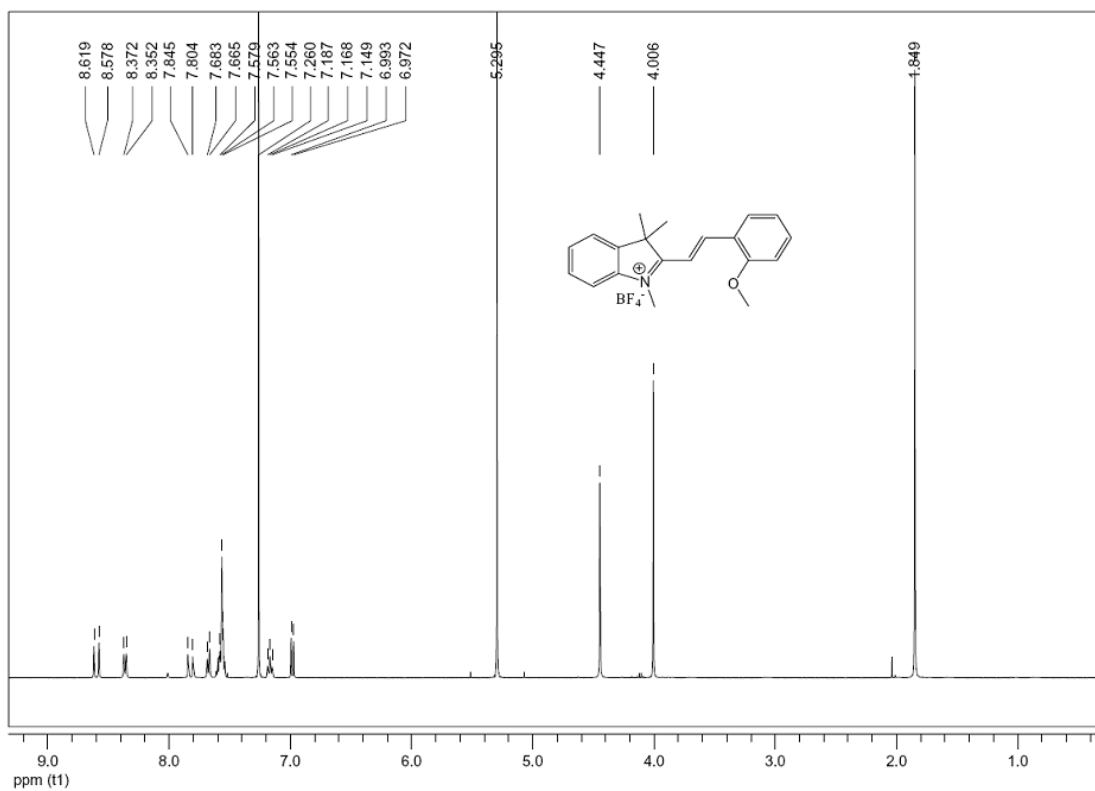

**Figure S23.** <sup>1</sup>H NMR of **4** (400 MHz) in CDCl<sub>3</sub>.
